# Supplementary material for: Performance and microbial communities of a batch anaerobic reactor treating liquid and high-solid sludge at thermophilic conditions
Source: Royal Society of Chemistry journal article supplement (doi:10.1039/c6ra21111a), 2016-01-01
Supplement: c6ra21111a1.pdf [file c6ra21111a1.pdf]

**Fig.S1.** Methane production rate of the reactors at different TS contents.

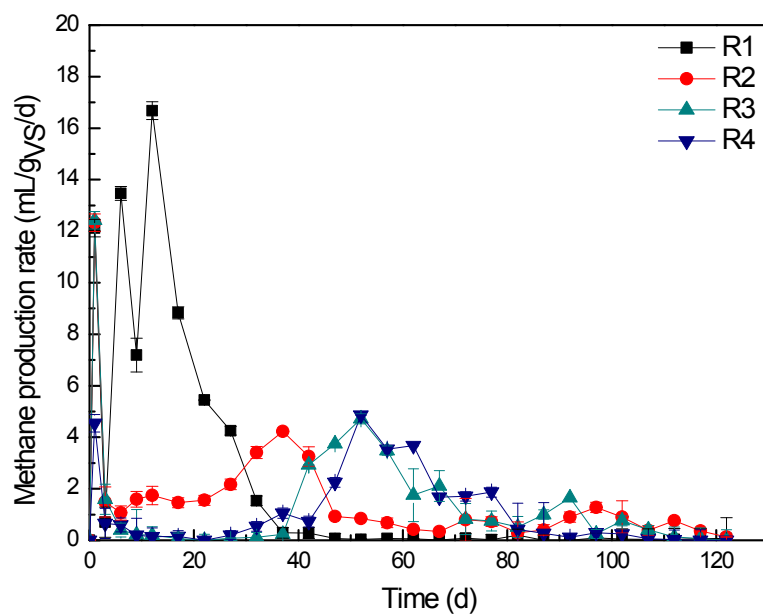

**Table S1**

Concentrations of soluble organic matters at different periods of the anaerobic digestion. Acetate, propionate, butyrate and valerate were summed as VFAs. Mean values were in triplicate.

| Sample |    | VFAs<br>(mg <sub>COD</sub> /g <sub>VS</sub> ) | Protein<br>(mg <sub>COD</sub> /g <sub>VS</sub> ) | Polysaccharide<br>(mg <sub>COD</sub> /g <sub>VS</sub> ) | Unknown<br>(mg <sub>COD</sub> /g <sub>VS</sub> ) |
|--------|----|-----------------------------------------------|--------------------------------------------------|---------------------------------------------------------|--------------------------------------------------|
| 6 d    | R1 | 270.7                                         | 9.6                                              | 15.0                                                    | 29.7                                             |
|        | R2 | 287.7                                         | 6.9                                              | 13.7                                                    | 87.5                                             |
|        | R3 | 331.0                                         | 13.1                                             | 16.6                                                    | 85.1                                             |
|        | R4 | 346.2                                         | 7.8                                              | 18.8                                                    | 230.3                                            |
| 37 d   | R1 | 28.4                                          | 10.7                                             | 25.6                                                    | 194.3                                            |
|        | R2 | 403.8                                         | 5.3                                              | 21.9                                                    | 295.9                                            |
|        | R3 | 402.4                                         | 7.6                                              | 21.3                                                    | 310.5                                            |
|        | R4 | 386.7                                         | 6.8                                              | 20.5                                                    | 395.1                                            |
| 87 d   | R1 | 41.5                                          | 23.4                                             | 30.7                                                    | 175.9                                            |
|        | R2 | 315.0                                         | 13.7                                             | 24.3                                                    | 185.0                                            |
|        | R3 | 275.9                                         | 11.1                                             | 24.7                                                    | 271.9                                            |
|        | R4 | 285.8                                         | 9.3                                              | 25.1                                                    | 369.0                                            |
| 122 d  | R1 | 51.7                                          | 19.7                                             | 31.3                                                    | 195.3                                            |
|        | R2 | 187.2                                         | 15.0                                             | 30.1                                                    | 198.8                                            |
|        | R3 | 246.0                                         | 14.3                                             | 32.3                                                    | 284.0                                            |
|        | R4 | 294.1                                         | 11.8                                             | 32.9                                                    | 298.7                                            |

**Table S2**

Relative abundance of major bacterial communities at genus level at different TS contents. Each represented by more than 0.5% total sequences in at least one sample and the rest was defined as “Unclassified”.

| Taxonomy assignment      | R1   | R2   | R3   | R4   |
|--------------------------|------|------|------|------|
| <i>Coprothermobacter</i> | 25.0 | 20.8 | 5.5  | 2.1  |
| <i>Allochromatium</i>    | 9.8  | 7.3  | 4.9  | 4.1  |
| <i>Anaerobaculum</i>     | 2.4  | 2.7  | 2.6  | 0.5  |
| <i>VadinCA02</i>         | 1.4  | 0.2  | 0.4  | 1.1  |
| <i>Rhodobacter</i>       | 1.2  | 1.1  | 2.4  | 3.5  |
| <i>Caldicoprobacter</i>  | 0.9  | 0.7  | 1.5  | 2.0  |
| <i>Bacillus</i>          | 0.7  | 0.8  | 0.2  | 0.5  |
| <i>Dechloromonas</i>     | 0.7  | 0.2  | 0.2  | 0.5  |
| <i>KDI-23</i>            | 0.5  | 0.2  | 0.6  | 0.3  |
| <i>Clostridium</i>       | 0.4  | 1.2  | 1.1  | 0.2  |
| <i>Nevskia</i>           | 0.3  | 1.0  | 3.5  | 5.4  |
| <i>Tepidimicrobium</i>   | 0.2  | 1.7  | 1.9  | 2.6  |
| <i>Syntrophomonas</i>    | 0.1  | 1.2  | 1.0  | 0.1  |
| <i>Thermacetogenium</i>  | -    | 0.4  | 2.1  | 1.9  |
| Unclassified             | 56.4 | 60.5 | 72.1 | 75.2 |

‘-’ indicates the presence of OTU is less than 0.1 % in the sample.

**Table S3**

Relative abundance of major archaea communities at genus level at different TS contents. Each represented by more than 0.5% total sequences in at least one sample and the rest was defined as “Unclassified”.

| Taxonomy assignment          | R1   | R2   | R3   | R4   |
|------------------------------|------|------|------|------|
| <i>Methanosarcina</i>        | 34.5 | 15.5 | 6.3  | 3.6  |
| <i>Methanosaeta</i>          | 19.0 | 22.9 | 22.5 | 21.4 |
| <i>Methanothermobacter</i>   | 36.7 | 42.0 | 21.8 | 2.1  |
| <i>Methanobacterium</i>      | 2.2  | 1.2  | 1.4  | 3.0  |
| <i>Methanospirillum</i>      | 2.2  | 0.4  | 1.1  | 2.0  |
| <i>Methanomassiliicoccus</i> | 0.7  | 0.6  | 0.1  | 0.3  |
| <i>Methanoculleus</i>        | 0.2  | 11.6 | 39.9 | 43.2 |
| <i>Methanobrevibacter</i>    | 0.1  | 0.1  | 0.5  | 1.5  |
| Unclassified                 | 4.4  | 5.7  | 6.4  | 22.9 |
